# Supplementary material
Source: ML conference proceedings conference paper supplement (https://aclanthology.org/2025.bionlp-1.15)
Supplement: SupplementaryMaterial [file 2025.bionlp-1.15.SupplementaryMaterial.zip]

Gastroenterologie -  
Polipectomie, polip mic 2022

POLIPECTOMIE MICA  
(per polip)

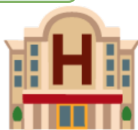

Clinic

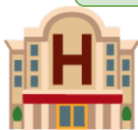

Clinic

Polipectomie, polip mic

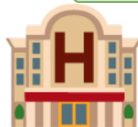

Clinic

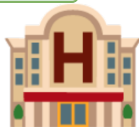

Clinic

Rezectie polip mic

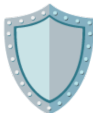

Insurance  
Company

Polipectomie polip mic
